# Supplementary material for: Effects of Typical Antimicrobials on Growth Performance, Morphology and Antimicrobial Residues of Mung Bean Sprouts
Source: MDPI journal article supplement (doi:10.3390/antibiotics11060807), 2022-06-15
Supplement: s1 [file s1]

## **Supplementary materials**

1. **Table S1** Positive ion A gradient elution conditions
2. **Table S2** Positive ion B gradient elution conditions
3. **Table S3** Negative ion gradient elution conditions
4. **Table S4** Mass spectrometry conditions in MRM mode
5. **Figure S1** Correlation between production of mung bean sprouts and OD450 in circulating water in 96 h

**Table S1** Positive ion A gradient elution conditions

| step | Total time (min) | A (%) | B (%) | flow rate |
|------|------------------|-------|-------|-----------|
| 1    | 0.00             | 90    | 3     | 0.4       |
| 2    | 1.00             | 90    | 3     | 0.4       |
| 3    | 1.10             | 60    | 15    | 0.4       |
| 4    | 9.50             | 40    | 75    | 0.4       |
| 5    | 9.60             | 10    | 95    | 0.4       |
| 6    | 11.50            | 10    | 95    | 0.4       |
| 7    | 11.60            | 90    | 3     | 0.4       |
| 8    | 13.00            | 97    | 3     | 0.4       |

**Table S2** Positive ion B gradient elution conditions

| <b>step</b> | <b>Total time (min)</b> | <b>A (%)</b> | <b>B (%)</b> | <b>flow rate</b> |
|-------------|-------------------------|--------------|--------------|------------------|
| 1           | 0.00                    | 90           | 10           | 0.3              |
| 2           | 0.50                    | 90           | 10           | 0.3              |
| 3           | 3.00                    | 60           | 40           | 0.3              |
| 4           | 6.00                    | 40           | 60           | 0.3              |
| 5           | 6.50                    | 10           | 90           | 0.3              |
| 6           | 8.00                    | 10           | 90           | 0.3              |
| 7           | 8.20                    | 90           | 10           | 0.3              |

**Table S3** Negative ion gradient elution conditions

| step | Total time (min) | A (%) | B (%) | flow rate |
|------|------------------|-------|-------|-----------|
| 1    | 0.00             | 80    | 20    | 0.5       |
| 2    | 0.50             | 80    | 20    | 0.5       |
| 3    | 2.80             | 2     | 98    | 0.5       |
| 4    | 4.00             | 2     | 98    | 0.5       |
| 5    | 4.10             | 80    | 20    | 0.5       |
| 6    | 6.00             | 80    | 20    | 0.5       |

**Table S4** Mass spectrometry conditions in MRM mode

| condition                       | positive ions | negative ions |
|---------------------------------|---------------|---------------|
| electrospray voltage            | 5500          | -4500         |
| curtain air pressure            | 30 psi        | 30 psi        |
| ion source atomizer temperature | 600°C         | 600°C         |
| atomizing gas pressure          | 50 psi        | 50 psi        |
| auxiliary gas pressure          | 60 psi        | 60 psi        |
| lHe                             | on            | on            |

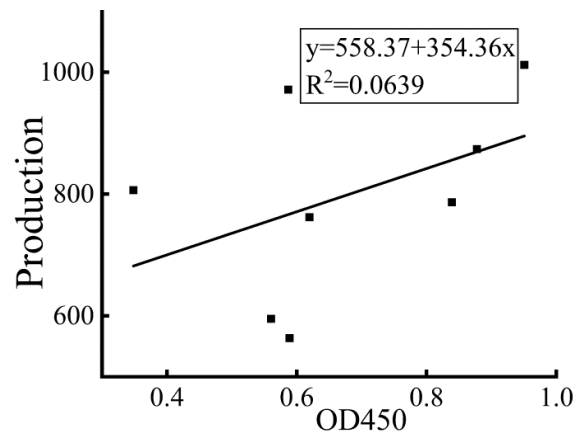

**Figure S1.** Correlation between production of mung bean sprouts and OD450 in circulating water in 96h.
